# Supplementary material
Source: ML conference proceedings conference paper supplement (https://proceedings.neurips.cc/paper_files/paper/2023/hash/fc6bd0eef19459655d5b097af783661d-Abstract.html)
Supplement: Supplementary file 1 [file fc6bd0eef19459655d5b097af783661d-Supplemental-Conference.pdf]

---

# Online POMDP Planning with Anytime Deterministic Guarantees - Supplementary

---

Anonymous Author(s)

Affiliation

Address

email

1 This document provides supplementary material to Online POMDP Planning with Anytime Deterministic  
2 Guarantees [1] and should not be considered a self-contained document. Throughout this report,  
3 all notations and definitions are in compliance with the ones presented in the main body of the paper.

## 4 Contents

|    |                                     |          |
|----|-------------------------------------|----------|
| 5  | <b>1 Mathematical Analysis</b>      | <b>1</b> |
| 6  | 1.1 Theorem 1 . . . . .             | 1        |
| 7  | 1.2 Lemma 1 . . . . .               | 4        |
| 8  | 1.3 Corollary 1.1 . . . . .         | 6        |
| 9  | <b>2 Experiments</b>                | <b>7</b> |
| 10 | 2.1 POMDP scenarios . . . . .       | 7        |
| 11 | 2.1.1 Tiger POMDP . . . . .         | 7        |
| 12 | 2.1.2 Discrete Light Dark . . . . . | 7        |
| 13 | 2.1.3 Laser Tag POMDP . . . . .     | 7        |
| 14 | 2.1.4 Baby POMDP . . . . .          | 7        |
| 15 | 2.2 Hyperparameters . . . . .       | 7        |

## 16 1 Mathematical Analysis

17 We start by restating the definition of the simplified value function,

$$\bar{V}^\pi(\bar{b}_t) \triangleq r(\bar{b}_t, \pi_t) + \bar{\mathbb{E}}[\bar{V}(b_t)] \quad (1)$$

$$= \sum_{x_t} \bar{b}(x_t) r(x_t, \pi_t) + \sum_{z_t} \bar{\mathbb{P}}(z_{t+1} \mid H_{t+1}^-) \bar{V}(\bar{b}(z_{t+1})), \quad (2)$$

### 18 1.1 Theorem 1

19 **Theorem 1** Let  $b_t$  belief state at time  $t$ , and  $T$  be the last time step of the POMDP. Let  $V^\pi(b_t)$  be  
20 the theoretical value function by following a policy  $\pi$ , and let  $\bar{V}^\pi(b_t)$  be the simplified value function,  
21 as defined in (1), by following the same policy. Then, for any policy  $\pi$ , the difference between the

22 *theoretical and simplified value functions is bounded as follows,*

$$|V^\pi(b_t) - \bar{V}^\pi(b_t)| \leq \mathcal{R}_{\max} \sum_{\tau=t+1}^T \left[ 1 - \sum_{z_{t+1:T}} \sum_{x_{t:T}} b(x_t) \prod_{k=t+1}^{\tau} \bar{\mathbb{P}}(z_k | x_k) \mathbb{P}(x_k | x_{k-1}, \pi_{k-1}) \right] \triangleq \epsilon_z^\pi(b_t). \quad (3)$$

23

24 **Proof 1** *For notational convenience, we derive the bounds for the value function by denoting the*  
 25 *prior belief as  $b_0$ ,*

$$V_0^\pi(b_0) = \mathbb{E}_{z_{1:T}} \left[ \sum_{t=0}^T r(b_t, a_t) \right] \quad (4)$$

26 *applying the belief update equation,*

$$V_0^\pi(b_0) = \sum_{z_{1:T}} \prod_{\tau=1}^T \mathbb{P}(z_\tau | H_\tau^-) \sum_{t=0}^T \left[ \sum_{x_t} \frac{\mathbb{P}(z_t | x_t) \sum_{x_{t-1}} \mathbb{P}(x_t | x_{t-1}, \pi_{t-1}) b_{t-1}}{\mathbb{P}(z_t | H_t^-)} r(x_t, a_t) \right] \quad (5)$$

$$= \sum_{z_{1:T}} \prod_{\tau=1}^T \mathbb{P}(z_\tau | H_\tau^-) \sum_{t=0}^T \left[ \sum_{x_{0:t}} \frac{\prod_{k=1}^t \mathbb{P}(z_k | x_k) \mathbb{P}(x_k | x_{k-1}, \pi_{k-1}) b(x_0)}{\prod_{\tau=1}^t \mathbb{P}(z_\tau | H_\tau^-)} r(x_t, a_t) \right] \quad (6)$$

$$= \sum_{t=0}^T \sum_{z_{1:T}} \sum_{x_{0:T}} \prod_{k=1}^t \mathbb{P}(z_k | x_k) \mathbb{P}(x_k | x_{k-1}, \pi_{k-1}) b(x_0) r(x_t, a_t) \quad (7)$$

27 *which applies similarly to the simplified value function,*

$$\bar{V}_0^\pi(b_0) = \sum_{t=0}^T \sum_{z_{1:T}} \sum_{x_{0:T}} \prod_{k=1}^t \bar{\mathbb{P}}(z_k | x_k) \mathbb{P}(x_k | x_{k-1}, \pi_{k-1}) b(x_0) r(x_t, a_t). \quad (8)$$

28 *We begin the derivation by focusing on a single time step,  $t$ , and later generalize to the complete*  
 29 *value function.*

$$|\mathbb{E}_{z_{1:t}}[r(b_t)] - \bar{\mathbb{E}}_{z_{1:t}}[r(\bar{b}_t)]| \quad (9)$$

$$= \left| \sum_{z_{1:t}} \sum_{x_{0:t}} \left[ \prod_{k=1}^t \mathbb{P}(z_k | x_k) \mathbb{P}(x_k | x_{k-1}, \pi_{k-1}) b(x_0) r(x_t) - \prod_{k'=1}^t \bar{\mathbb{P}}(z_{k'} | x_{k'}) \mathbb{P}(x_{k'} | x_{k'-1}, \pi_{k'-1}) b(x_0) r(x_t) \right] \right| \quad (10)$$

$$\leq \sum_{z_{1:t}} \sum_{x_{0:t}} \left| r(x_t) \left[ \prod_{k=1}^t \mathbb{P}(z_k | x_k) \mathbb{P}(x_k | x_{k-1}, \pi_{k-1}) b(x_0) - \prod_{k'=1}^t b(x_0) \bar{\mathbb{P}}(z_{k'} | x_{k'}) \mathbb{P}(x_{k'} | x_{k'-1}, \pi_{k'-1}) \right] \right| \quad (11)$$

$$= \sum_{z_{1:t}} \sum_{x_{0:t}} |r(x_t)| \left[ \prod_{k=1}^t \mathbb{P}(z_k | x_k) \mathbb{P}(x_k | x_{k-1}, \pi_{k-1}) b(x_0) - \prod_{k'=1}^t b(x_0) \bar{\mathbb{P}}(z_{k'} | x_{k'}) \mathbb{P}(x_{k'} | x_{k'-1}, \pi_{k'-1}) \right] \quad (12)$$

30 *where the second transition is due to triangle inequality, the third transition is equality by the*  
 31 *construction, i.e. using the simplified observation models imply that the difference is nonnegative. We*

32 *add and subtract, followed by rearranging terms,*

$$= \sum_{z_{1:t}} \sum_{x_{0:t}} |r(x_t)| \quad (13)$$

$$\begin{aligned} & \left[ \prod_{k=1}^t \mathbb{P}(z_k, x_k \mid x_{k-1}, \pi_{k-1}) b(x_0) - \prod_{k=1}^{t-1} b(x_0) \bar{\mathbb{P}}(z_k, x_k \mid x_{k-1}, \pi_{k-1}) \mathbb{P}(z_t, x_t \mid x_{t-1}, \pi_{t-1}) \right. \\ & \quad \left. + \prod_{k=1}^{t-1} \bar{b}(x_0) \bar{\mathbb{P}}(z_k, x_k \mid x_{k-1}, \pi_{k-1}) \mathbb{P}(z_t, x_t \mid x_{t-1}, \pi_{t-1}) - \prod_{k'=1}^t b(x_0) \bar{\mathbb{P}}(z_{k'}, x_{k'} \mid x_{k'-1}, \pi_{k'-1}) \right] \\ & = \sum_{z_{1:t}} \sum_{x_{0:t}} |r(x_t)| \left\{ \right. \end{aligned} \quad (14)$$

$$\begin{aligned} & \mathbb{P}(z_t, x_t \mid x_{t-1}, \pi_{t-1}) \left[ \prod_{k=1}^{t-1} \mathbb{P}(z_k, x_k \mid x_{k-1}, \pi_{k-1}) b(x_0) - \prod_{k=1}^{t-1} b(x_0) \bar{\mathbb{P}}(z_k, x_k \mid x_{k-1}, \pi_{k-1}) \right] \\ & \quad \left. + \prod_{k=1}^{t-1} \bar{b}(x_0) \bar{\mathbb{P}}(z_k, x_k \mid x_{k-1}, \pi_{k-1}) [\mathbb{P}(z_t, x_t \mid x_{t-1}, \pi_{t-1}) - \bar{\mathbb{P}}(z_t, x_t \mid x_{t-1}, \pi_{t-1})] \right\} \end{aligned}$$

33 *applying Holder's inequality,*

$$\leq \mathcal{R}_{\max} \sum_{z_{1:t}} \sum_{x_{0:t}} \mathbb{P}(z_t, x_t \mid x_{t-1}, \pi_{t-1}) \left[ b(x_0) \prod_{k=1}^{t-1} \mathbb{P}(z_k, x_k \mid x_{k-1}, \pi_{k-1}) - b(x_0) \prod_{k=1}^{t-1} \bar{\mathbb{P}}(z_k, x_k \mid x_{k-1}, \pi_{k-1}) \right] \quad (15)$$

$$\begin{aligned} & + \mathcal{R}_{\max} \sum_{z_{1:t}} \sum_{x_{0:t}} \prod_{k=1}^{t-1} \bar{\mathbb{P}}(z_k, x_k \mid x_{k-1}, \pi_{k-1}) b(x_0) [\mathbb{P}(z_t, x_t \mid x_{t-1}, \pi_{t-1}) - \bar{\mathbb{P}}(z_t, x_t \mid x_{t-1}, \pi_{t-1})] \\ & = \mathcal{R}_{\max} \sum_{z_{1:t}} \sum_{x_{0:t}} \mathbb{P}(z_t, x_t \mid x_{t-1}, \pi_{t-1}). \end{aligned} \quad (16)$$

$$\begin{aligned} & \left[ b(x_0) \prod_{k=1}^{t-1} \mathbb{P}(z_k, x_k \mid x_{k-1}, \pi_{k-1}) - b(x_0) \prod_{k=1}^{t-1} \bar{\mathbb{P}}(z_k, x_k \mid x_{k-1}, \pi_{k-1}) \right] + \mathcal{R}_{\max} \delta_t \\ & = \mathcal{R}_{\max} \sum_{z_{1:t-1}} \sum_{x_{0:t-1}} \left[ b(x_0) \prod_{k=1}^{t-1} \mathbb{P}(z_k, x_k \mid x_{k-1}, \pi_{k-1}) - b(x_0) \prod_{k=1}^{t-1} \bar{\mathbb{P}}(z_k, x_k \mid x_{k-1}, \pi_{k-1}) \right] \quad (17) \\ & \quad + \mathcal{R}_{\max} \delta_t, \end{aligned}$$

34 *following similar steps recursively,*

$$= \dots = \mathcal{R}_{\max} \sum_{\tau=1}^t \delta_{\tau}. \quad (18)$$

35 *Finally, applying similar steps for every time step  $t \in [1, T]$  results in,*

$$|V^{\pi}(b_t) - \bar{V}^{\pi}(b_t)| \leq \mathcal{R}_{\max} \sum_{t=1}^T \sum_{\tau=1}^t \delta_{\tau} \quad (19)$$

36 *where,*

$$\begin{aligned} \delta_{\tau} & = \sum_{z_{1:\tau}} \sum_{x_{0:\tau}} \prod_{k=1}^{\tau-1} \bar{\mathbb{P}}(z_k, x_k \mid x_{k-1}, \pi_{k-1}) b(x_0) [\mathbb{P}(z_{\tau}, x_{\tau} \mid x_{\tau-1}, \pi_{\tau-1}) - \bar{\mathbb{P}}(z_{\tau}, x_{\tau} \mid x_{\tau-1}, \pi_{\tau-1})] \\ & = \sum_{z_{1:\tau-1}} \sum_{x_{0:\tau-1}} \prod_{k=1}^{\tau-1} \bar{\mathbb{P}}(z_k, x_k \mid x_{k-1}, \pi_{k-1}) b(x_0) [1 - \sum_{z_{\tau}} \sum_{x_{\tau}} \bar{\mathbb{P}}(z_{\tau}, x_{\tau} \mid x_{\tau-1}, \pi_{\tau-1})] \end{aligned} \quad (20)$$

37 *plugging the term in (20) to (19) and expanding the terms results in the desired bound,*

$$|V^{\pi}(b_t) - \bar{V}^{\pi}(b_t)| \leq \mathcal{R}_{\max} \sum_{\tau=t+1}^T \left[ 1 - \sum_{z_{t+1:\tau}} \sum_{x_{t:\tau}} b(x_t) \prod_{k=t+1}^{\tau} \bar{\mathbb{P}}(z_k \mid x_k) \mathbb{P}(x_k \mid x_{k-1}, \pi_{k-1}) \right] \quad (21)$$

38 which concludes our derivation.

## 39 1.2 Lemma 1

40 **Lemma 1** The optimal value function can be bounded as

$$V^{\pi^*}(b_t) \leq \text{UDB}^\pi(b_t), \quad (22)$$

41 where the policy  $\pi$  is determined according to Bellman optimality over the UDB, i.e.

$$\text{UDB}^\pi(b_t) \triangleq \max_{a_t \in \mathcal{A}} [\bar{Q}^\pi(b_t, a_t) + \epsilon_z^\pi(b_t, a_t)] \quad (23)$$

$$= \max_{a_t \in \mathcal{A}} [r(b_t, a_t) + \bar{\mathbb{E}}_{z_{t+1}|b_t, a_t} [\bar{V}^\pi(b_{t+1})] + \epsilon_z^\pi(b_t, a_t)]. \quad (24)$$

42

43 **Proof 2** In the following, we prove by induction that applying the Bellman optimality operator on  
 44 upper bounds to the value function in finite-horizon POMDPs will result in an upper bound on the  
 45 optimal value function. The notations are the same as the ones presented in the main body of the  
 46 paper. We restate some of the definitions from the paper for convenience.

47 The policy  $\pi_t(b_t)$  determined by applying Bellman optimality at belief  $b_t$ , i.e.,

$$\pi_t(b_t) = \arg \max_{a_t \in \mathcal{A}} [\bar{Q}^\pi(b_t, a_t) + \epsilon_z^\pi(b_t, a_t)]. \quad (25)$$

48 As it will be needed in the following proof, we also define the value of a belief which includes in its  
 49 history at least one observation out of the simplified set, e.g.  $H_t = \{a_0, z_1, \dots, z_k \notin \bar{\mathcal{Z}}, \dots, z_t\}$  as  
 50 being equal to zero. Explicitly,

$$\bar{V}_t^\pi(\mathbb{P}(x_t | a_0, z_1, \dots, z_k \notin \bar{\mathcal{Z}}, \dots, z_t)) \equiv 0 \quad \forall k \in [1, t]. \quad (26)$$

51 We also use the following simple bound,

$$V_{t, \max} \triangleq \mathcal{R}_{\max} \cdot (T - t - 1) \quad (27)$$

52 **Base case** ( $t = T$ ) - At the final time step  $T$ , for each belief we set the value function to be equal to  
 53 the reward value at that belief state,  $b_T$  and taking the action that maximizes the immediate reward,

$$\text{UDB}^\pi(b_T) = \max_{a_T} \{r(b_T, a_T) + \epsilon_z(b_T, a_T)\} = \arg \max_{a_T} \{r(b_T, a_T)\} \quad (28)$$

54 which provides an upper bound for the optimal value function for the final time step,  $V_T^*(b_T) \leq$   
 55  $\text{UDB}^\pi(b_T)$ .

56 **Induction hypothesis** - Assume that for a given time step,  $t$ , for all belief states the following holds,

$$V_t^*(b_t) \leq \text{UDB}^\pi(b_t). \quad (29)$$

57 **Induction step** - We will show that the hypothesis holds for time step  $t - 1$ . By the induction hypothesis,

$$V_t^*(b_t) \leq \text{UDB}^\pi(b_t) \quad \forall b_t, \quad (30)$$

58 thus,

$$Q^*(b_{t-1}, a_{t-1}) = r(b_{t-1}, a_{t-1}) + \sum_{z_t \in \mathcal{Z}} \mathbb{P}(z_t | H_t^-) V_t^*(b(z_t)) \quad (31)$$

$$\leq r(b_{t-1}, a_{t-1}) + \sum_{z_t \in \mathcal{Z}} \mathbb{P}(z_t | H_t^-) \text{UDB}^\pi(b(z_t)) \quad (32)$$

$$= r(b_{t-1}, a_{t-1}) + \sum_{z_t \in \mathcal{Z}} \mathbb{P}(z_t | H_t^-) [\bar{V}_t^\pi(b_t) + \epsilon_z^\pi(b_t)]. \quad (33)$$

59 For the following transition, we make use of lemma 2,

$$= r(b_{t-1}, a_{t-1}) + \bar{\mathbb{E}}_{z_t|b_{t-1}, a_{t-1}} [\bar{V}_t^\pi(b_t)] + \epsilon_z^\pi(b_{t-1}, a_{t-1}) \quad (34)$$

$$\equiv \text{UDB}^\pi(b_{t-1}, a_{t-1}). \quad (35)$$

Therefore, under the induction hypothesis,  $Q_{t-1}^*(b_{t-1}, a_{t-1}) \leq \text{UDB}^\pi(b_{t-1}, a_{t-1})$ . Taking the maximum over all actions  $a_t$ ,

$$\begin{aligned} \text{UDB}^\pi(b_{t-1}) &= \max_{a_{t-1} \in \mathcal{A}} \{\text{UDB}^\pi(b_{t-1}, a_{t-1})\} \\ &\geq \max_{a_{t-1} \in \mathcal{A}} \{Q_{t-1}^*(b_{t-1}, a_{t-1})\} = V_{t-1}^*(b_{t-1}), \end{aligned} \quad (36)$$

which completes the induction step and the required proof.

**Lemma 2** Let  $b_t$  denote a belief state and  $\pi_t$  a policy at time  $t$ . Let  $\bar{\mathcal{P}}(z_t | x_t)$  be the simplified observation model which represents the likelihood of observing  $z_t$  given  $x_t$ . Then, the following terms are equivalent,

$$\mathbb{E}_{z_t} [\bar{V}_t^\pi(b_t) + \epsilon_z^\pi(b_t)] = \bar{\mathbb{E}}_{z_t} [\bar{V}_t^\pi(b_t)] + \epsilon_z^\pi(b_{t-1}, a_{t-1}) \quad (37)$$

**Proof 3**

$$\begin{aligned} &\mathbb{E}_{z_t} [\bar{V}_t^\pi(b_t) + \epsilon_z^\pi(b_t)] = \\ &\mathbb{E}_{z_t} [\bar{V}_t^\pi(b_t)] + \mathbb{E}_{z_t} \left[ \mathcal{R}_{\max} \sum_{\tau=t+1}^T \left[ 1 - \sum_{z_{t+1:\tau}} \sum_{x_{t:\tau}} b_t \prod_{k=t+1}^{\tau} \bar{\mathbb{P}}(z_k | x_k) \mathbb{P}(x_k | x_{k-1}, \pi_{k-1}) \right] \right] \end{aligned} \quad (38)$$

focusing on the second summand,

$$\sum_{z_t \in \mathcal{Z}} \mathbb{P}(z_t | H_t^-) \mathcal{R}_{\max} \sum_{\tau=t+1}^T \left[ 1 - \sum_{z_{t+1:\tau}} \sum_{x_{t:\tau}} b_t \prod_{k=t+1}^{\tau} \bar{\mathbb{P}}(z_k | x_k) \mathbb{P}(x_k | x_{k-1}, \pi_{k-1}) \right] \quad (40)$$

$$= \mathcal{R}_{\max} \sum_{\tau=t+1}^T \left[ 1 - \sum_{z_t} \mathbb{P}(z_t | H_t^-) \sum_{z_{t+1:\tau}} \sum_{x_{t:\tau}} b(x_t) \prod_{k=t+1}^{\tau} \bar{\mathbb{P}}(z_k | x_k) \mathbb{P}(x_k | x_{k-1}, \pi_{k-1}) \right] \quad (41)$$

by marginalizing over  $x_{t-1}$ ,

$$\begin{aligned} &= \mathcal{R}_{\max} \sum_{\tau=t+1}^T \left[ 1 - \sum_{z_t} \mathbb{P}(z_t | H_t^-) \sum_{z_{t+1:\tau}} \sum_{x_{t-1:\tau}} \frac{\bar{\mathbb{P}}(z_t | x_t) \mathbb{P}(x_t | x_{t-1}, \pi_{t-1}) b(x_{t-1})}{\mathbb{P}(z_t | H_t^-)} \right. \\ &\quad \left. \prod_{k=t+1}^{\tau} \bar{\mathbb{P}}(z_k | x_k) \mathbb{P}(x_k | x_{k-1}, \pi_{k-1}) \right] \end{aligned} \quad (42)$$

canceling out the denominator,

$$\begin{aligned} &= \mathcal{R}_{\max} \sum_{\tau=t+1}^T \left[ 1 - \sum_{z_{t:\tau}} \sum_{x_{t-1:\tau}} \bar{\mathbb{P}}(z_t | x_t) \mathbb{P}(x_t | x_{t-1}, a_{t-1}) b(x_{t-1}) \cdot \right. \\ &\quad \left. \prod_{k=t+1}^{\tau} \bar{\mathbb{P}}(z_k | x_k) \mathbb{P}(x_k | x_{k-1}, \pi_{k-1}) \right] \equiv \epsilon_z^\pi(b_{t-1}, a_{t-1}) \end{aligned} \quad (43)$$

it is left to show that  $\mathbb{E}_{z_t | b_{t-1}, a_{t-1}} [\bar{V}_t^\pi(b_t)] = \bar{\mathbb{E}}_{z_t | b_{t-1}, a_{t-1}} [\bar{V}_t^\pi(b_t)]$ . By the definition of a value function of a belief not included in the simplified set, we have that,

$$\mathbb{E}_{z_t|b_{t-1},a_{t-1}} [\bar{V}_t^\pi(b_t)] = \sum_{z_t \in \mathcal{Z}} \mathbb{P}(z_t | H_t^-) \bar{V}_t^\pi(b_t) \quad (44)$$

$$= \sum_{z_t \in \bar{\mathcal{Z}}} \mathbb{P}(z_t | H_t^-) \bar{V}_t^\pi(b_t) + \sum_{z_t \in \mathcal{Z} \setminus \bar{\mathcal{Z}}} \mathbb{P}(z_t | H_t^-) \bar{V}_t^\pi(b_t) \quad (45)$$

$$= \sum_{z_t \in \bar{\mathcal{Z}}} \bar{\mathbb{P}}(z_t | H_t^-) \cdot \bar{V}_t^\pi(b_t) + \sum_{z_t \in \mathcal{Z} \setminus \bar{\mathcal{Z}}} \mathbb{P}(z_t | H_t^-) \cdot 0 \quad (46)$$

$$= \mathbb{E}_{z_t|b_{t-1},a_{t-1}} [\bar{V}_t^\pi(b_t)], \quad (47)$$

72 which concludes the derivation.

### 73 1.3 Corollary 1.1

74 We restate the definition of UDB exploration criteria,

$$a_t = \arg \max_{a_t \in \mathcal{A}} [\text{UDB}^\pi(b_t, a_t)] = \arg \max_{a_t \in \mathcal{A}} [\bar{Q}^\pi(b_t, a_t) + \epsilon_z^\pi(b_t, a_t)]. \quad (48)$$

75

76 **Corollary 1.1** Using Lemma 1 and the exploration criteria defined in (48) guarantees convergence  
77 to the optimal value function.

78 **Proof 4** Let us define a sequence of bounds,  $\text{UDB}_n^\pi(b_t)$  and a corresponding difference value between  
79  $\text{UDB}_n$  and the simplified value function,

$$\text{UDB}_n^\pi(b_t) - \bar{V}_n^\pi(b_t) = \epsilon_{n,z}^\pi(b_t), \quad (49)$$

80 where  $n \in [0, |\mathcal{Z}|]$  corresponds to the number of unique observation instances within the simplified  
81 observation set,  $\bar{\mathcal{Z}}_n$ , and  $|\mathcal{Z}|$  denotes the cardinality of the complete observation space. Additionally,  
82 for the clarity of the proof and notations, assume that by construction the simplified set is chosen  
83 such that  $\bar{\mathcal{Z}}_n(H_t) \equiv \bar{\mathcal{Z}}_n$  remains identical for all time steps  $t$  and history sequences,  $H_t$  given  $n$ . By  
84 the definition of  $\epsilon_{n,z}^\pi(b_t)$ ,

$$\epsilon_{n,z}^\pi(b_t) = \mathcal{R}_{\max} \sum_{\tau=t+1}^T \left[ 1 - \sum_{z_{t+1:\tau} \in \bar{\mathcal{Z}}_n} \sum_{x_{t:\tau}} b(x_t) \prod_{k=t+1}^{\tau} \bar{\mathbb{P}}(z_k | x_k) \mathbb{P}(x_k | x_{k-1}, \pi_{k-1}) \right], \quad (50)$$

85 we have that  $\epsilon_{n,z}^\pi(b_t) \rightarrow 0$  as  $n \rightarrow |\mathcal{Z}|$ , since

$$\sum_{z_{t+1:\tau} \in \bar{\mathcal{Z}}_n} \sum_{x_{t:\tau}} b(x_t) \prod_{k=t+1}^{\tau} \bar{\mathbb{P}}(z_k | x_k) \mathbb{P}(x_k | x_{k-1}, \pi_{k-1}) \rightarrow 1 \quad (51)$$

86 as more unique observation elements are added to the simplified observation space,  $\bar{\mathcal{Z}}_n$ , eventually  
87 recovering the entire support of the discrete observation distribution.

88 From lemma 1 we have that, for all  $n \in [0, |\mathcal{Z}|]$  the following holds,

$$V^{\pi^*}(b_t) \leq \text{UDB}_n^\pi(b_t) = \bar{V}_n^\pi(b_t) + \epsilon_{n,z}^\pi(b_t). \quad (52)$$

89 Additionally, from theorem 1 we have that,

$$|V^\pi(b_t) - \bar{V}_n^\pi(b_t)| \leq \epsilon_{n,z}^\pi(b_t), \quad (53)$$

90 for any policy  $\pi$  and subset  $\bar{\mathcal{Z}}_n \subseteq \mathcal{Z}$ , thus,

$$\bar{V}_n^\pi(b_t) - \epsilon_{n,z}^\pi(b_t) \leq V^\pi(b_t) \leq V^{\pi^*}(b_t) \leq \bar{V}_n^\pi(b_t) + \epsilon_{n,z}^\pi(b_t). \quad (54)$$

91 Since  $\epsilon_{n,z}^\pi(b_t) \rightarrow 0$  as  $n \rightarrow |\mathcal{Z}|$ , and  $|\mathcal{Z}|$  is finite, it is guaranteed that  $\text{UDB}_n^\pi(b_t) \xrightarrow{n \rightarrow |\mathcal{Z}|} V^{\pi^*}(b_t)$   
92 which completes our proof.

93 Moreover, depending on the algorithm implementation, the number of iterations can be finite (e.g. by  
94 directly choosing actions and observations to minimize the bound). A stopping criteria can also be  
95 verified by calculating the difference between the upper and lower bounds. The optimal solution is  
96 obtained once the upper bound equals the lower bound.

## 97 2 Experiments

### 98 2.1 POMDP scenarios

99 We begin with a brief description of the Partially Observable Markov Decision Process (POMDP)  
100 scenarios implemented for the experiments. each scenario was bounded by a finite number of time  
101 steps used for every episode, where each action taken by the agent led to a decrement in the number  
102 of time steps left. After the allowable time steps ended, the simulation was reset to its initial state.

#### 103 2.1.1 Tiger POMDP

104 The Tiger is a classic POMDP problem [2], involves an agent making decisions between two doors,  
105 one concealing a tiger and the other a reward. The agent needs to choose among three actions,  
106 either open each one of the doors or listen to receive an observation about the tiger position. In  
107 our experiments, the POMDP was limited horizon of 5 steps. The problem consists of 3 actions, 2  
108 observations and 2 states.

#### 109 2.1.2 Discrete Light Dark

110 Is an adaptation from [4]. In this setting the agent needs to travel on a 1D grid to reach a target  
111 location. The grid is divided into a dark region, which offers noisy observations, and a light region,  
112 which offers accurate localization observations. The agent receives a penalty for every step and a  
113 reward for reaching the target location. The key challenge is to balance between information gathering  
114 by traveling towards the light area, and moving towards the goal region.

#### 115 2.1.3 Laser Tag POMDP

116 In the Laser Tag problem, [3], an agent has to navigate through a grid world, shoot and tag opponents  
117 by using a laser gun. The main goal is to tag as many opponents as possible within a given time frame.  
118 The grid is segmented into various sections that have varying visibility, characterized by obstacles  
119 that block the line of sight, and open areas. There are five possible actions, moving in four cardinal  
120 directions (North, South, East, West) and shooting the laser. The observation space cardinality is  
121  $|\mathcal{Z}| \approx 1.5 \times 10^6$ , which is described as a discretized normal distribution and reflect the distance  
122 measured by the laser. The states reflect the agent’s current position and the opponents’ positions.  
123 The agent receives a reward for tagging an opponent and a penalty for every movement, encouraging  
124 the agent to make strategic moves and shots.

#### 125 2.1.4 Baby POMDP

126 The Baby POMDP is a classic problem that represents the scenario of a baby and a caregiver. The  
127 agent, playing the role of the caregiver, needs to infer the baby’s needs based on its state, which can be  
128 either crying or quiet. The states in this problem represent the baby’s needs, which could be hunger,  
129 discomfort or no need. The agent has three actions to choose from: feeding, changing the diaper, or  
130 doing nothing. The observations are binary, either the baby is crying or not. The crying observation  
131 does not uniquely identify the baby’s state, as the baby may cry due to hunger or discomfort, which  
132 makes this a partially observable problem. The agent receives a reward when it correctly addresses  
133 the baby’s needs and a penalty when the wrong action is taken.

### 134 2.2 Hyperparameters

135 The hyperparameters for both DB-DESPOT and AR-DESPOT algorithms were selected through a  
136 grid search. We explored an array of parameters for AR-DESPOT, choosing the highest-performing  
137 configuration. Specifically, the hyperparameter  $K$  was varied across  $\{10, 50, 500, 5000\}$ , while  $\lambda$   
138 was evaluated at  $\{0, 0.01, 0.1\}$ .

139 For upper and lower bounds used both by DB-DESPOT (which results in deterministic bounds) and  
140 AR-DESPOT (which result in probabilistic bounds); we used the maximal reward, multiplied by the  
141 remaining time steps of the episode,  $\mathcal{R}_{\max} \cdot (\mathcal{T} - t - 1)$ .

142 Finally, we provide our algorithm implementation in *[will be provided upon official publication of*  
143 *the paper]*.

## References

- [1] Anonymous Author(s). Online pomdp planning with anytime deterministic guarantees. Technical report.
- [2] L. P. Kaelbling, M. L. Littman, and A. R. Cassandra. Planning and acting in partially observable stochastic domains. *Artificial intelligence*, 101(1):99–134, 1998.
- [3] Adhiraj Somani, Nan Ye, David Hsu, and Wee Sun Lee. Despot: Online pomdp planning with regularization. In *NIPS*, volume 13, pages 1772–1780, 2013.
- [4] Zachary Sunberg and Mykel Kochenderfer. Online algorithms for pomdps with continuous state, action, and observation spaces. In *Proceedings of the International Conference on Automated Planning and Scheduling*, volume 28, 2018.
